1 **Iran's roads: mitigating the most serious threat to the critically**  
2 **endangered Asiatic cheetah *Acinonyx jubatus venaticus***

3

4 Jamshid Parchizadeh<sup>1</sup>, Maria Gatta<sup>2</sup>, Roberta Bencini<sup>3</sup>, Ali Turk Qashqaei<sup>4</sup>, Mohammad Ali Adibi<sup>5,6</sup>, Samuel T.  
5 Williams<sup>7,8</sup>

6 <sup>1</sup>Third Floor, Number 24, Zartoshtian Alley, Hafez Street, Tehran City, Tehran Province, Iran

7 <sup>2</sup>School of Animal, Plant and Environmental Sciences, University of the Witwatersrand, Johannesburg, South  
8 Africa

9 <sup>3</sup>School of Animal Biology, The University of Western Australia, M092, 35 Stirling Highway, Crawley, WA 6009,  
10 Australia

11 <sup>4</sup>Plan for the Land Society, P.O. 1689733767, Tehran City, Tehran Province, Iran

12 <sup>5</sup>Semnan Provincial office of Iran Department of the Environment, Semnan Province, Iran

13 <sup>6</sup>Faculty of Environment and Energy, Department of Habitats and Biodiversity, Islamic Azad University, Science  
14 and Research Branch, Tehran City, Tehran Province, Iran

15 <sup>7</sup>Department of Zoology, School of Mathematical & Natural Sciences, University of Venda, Thohoyandou, South  
16 Africa

17 <sup>8</sup>Department of Anthropology, Durham University, Durham, United Kingdom

18

19 **Keywords:** carnivore, road ecology, wildlife-vehicle collisions, conservation

20

21

## 22 **Abstract**

23 Wildlife-vehicle collisions are an important cause of mortality for many species, and the number of collisions is  
24 expected to grow rapidly as the global road network quickly expands over the next few decades. Wildlife-vehicle  
25 collisions also have the potential to be extremely detrimental to small wildlife populations, such as the critically  
26 endangered Asiatic cheetah (*Acinonyx jubatus venaticus*), with only 43 individuals remaining in the wild. We  
27 assessed the spatial distribution of road mortalities between 2004 and 2016 to identify roadkill hotspots involving  
28 Asiatic cheetahs in Iran using network kernel density estimation. A total of sixteen cheetah fatalities due to wildlife-  
29 vehicle collisions were recorded, and we identified six road fragments as roadkill hotspots. Efforts to reduce  
30 wildlife-cheetah collisions should be targeted in the densest hotspots. We review the options available to achieve  
31 this, and we recommend a strategic shift away from the ineffective warning signage currently used, and instead  
32 suggest adopting an evidence-based approach focusing on installing wildlife crossing structures in conjunction with  
33 fencing in roadkill hotspots. These measures will help to enhance the conservation status of the Asiatic cheetah, as  
34 the current high level of mortality of Asiatic cheetahs on Iran's roads could have potentially dramatic impacts on  
35 this critically endangered subspecies.

36

## 37 **Introduction**

38 The rapid expansion of infrastructure has had severe impacts on the abundance of wildlife across the globe (Grilo et  
39 al. 2015). Roads can be particularly harmful, as they have both indirect effects such as providing people with access  
40 for hunting and further development, and direct effects such as inhibiting the movement of animals, and causing  
41 direct mortality through wildlife-vehicle collisions (Laurance et al. 2009; Collinson et al. 2015). The taxa that are at  
42 the greatest risk to threats associated with roads include amphibians, reptiles, and mammals, especially large  
43 carnivores such as cheetahs (*Acinonyx jubatus*), due to their large home ranges and small population sizes (Grilo et  
44 al. 2015; Ceia-Hasse et al. 2017; Durant et al. 2017; M. Huijser, pers. comm.). Collisions with vehicles are known to  
45 be a source of cheetah mortality in countries such as Tanzania and South Africa (Tawiri 2005; Collinson et al.  
46 2015), but this is rarely quantified in relation to other threats (Gadd 2015). In Iran the critically endangered Asiatic

47 cheetah (*A. j. venaticus*) is particularly susceptible to these threats due to its extremely small population size (Jowkar  
48 et al. 2008).

49 A total of only 43 free-roaming Asiatic cheetahs remain (Durant et al. 2017), all of which occur in central Iran in the  
50 provinces of Isfahan, Kerman, North Khorasan, Semnan, South Khorasan, and Yazd (Khaleghparast 2015). After an  
51 absence of almost 40 years, Asiatic cheetahs were recently observed in the Golestan and Razavi Khorasan provinces  
52 (Khaleghparast 2015). Collisions with vehicles pose the most serious threat to Asiatic cheetahs, with one to two  
53 Asiatic cheetahs killed by vehicles on Iran's roads annually (Hunter et al. 2007; Farhadinia et al. 2017). Between  
54 2004 and 2016 roadkill was the most important cause of Asiatic cheetah mortality (Ahmadi et al. 2017). There have  
55 been few studies, however, of the distribution of cheetah roadkills, although this would be incredibly useful to  
56 inform mitigation strategies.

57 We assessed the distribution of road mortalities involving Asiatic cheetahs to establish where these events occur  
58 most frequently, enabling us to identify roadkill hotspots at which mitigation measures should be targeted. We also  
59 briefly review potential strategies that could be implemented to reduce the threats posed by roads to cheetahs in Iran.

60

## 61 **Methods**

### 62 *Study area*

63 Iran has a total area 1,648,195 km<sup>2</sup>, and a quarter of the country is composed of arid and semi-arid deserts (Mansouri  
64 2004; Sabziparvar 2008) (Fig. 1). Kerman, Semnan, and Yazd Provinces are located between 51°47'20" and  
65 61°09'47" E and 26°00'40" and 37°21'54" N, and cover an area of 480,909 km<sup>2</sup>. The climate of the provinces is dry,  
66 with mean maximum daily temperature of up to 55 °C in summer, and mean minimum daily temperatures of down  
67 to -20 °C in winter. Altitude varies from 500 to 1,200 m, with precipitation ranging from 70 to 111 mm annually.  
68 The dominant plant species are *Artemisia siberi* and *Astragalus gossypius* (Heshmati 2007).

### 69 *Data collection*

70 Between 2004 and 2016 local people reported the location of cheetah carcasses they encountered along roads by  
71 telephoning their local Office of Iran's Department of the Environment. The authorities inspected the carcasses to

72 determine cause of death and recorded the coordinates using GPS Garmin Etrex 10 (Garmin International Inc.,  
73 Olathe, KS, USA). The data were collected by the Conservation of the Asiatic Cheetah Project, a project under  
74 Iran's Department of the Environment in collaboration with the United Nations Development Programme, the  
75 Wildlife Conservation Society, Panthera, Cheetah Conservation Fund, and the Cat Specialist Group of the  
76 International Union for Conservation of Nature (Conservation of the Asiatic Cheetah Project 2001).

#### 77 *Data analysis*

78 We used network kernel density estimation (NetKDE) to identify the locations of Asiatic cheetah roadkill hotspots,  
79 which is an extension of the planar KDE methods and has been frequently used to identify wildlife-vehicle collision  
80 hotspots for other species (Danks and Porter 2010; Morelle et al. 2013; Snow et al. 2014; Özcan and Özkazanç  
81 2017). Planar KDE produces a probability surface of points in a 2-dimensional space, which provides a visualization  
82 of different concentrations of the event across the study area. A critical aspect of the KDE analysis is the bandwidth  
83 value ( $h$ ) which is the distance over which a data point has influence. However, accidents along a road network do  
84 not meet the assumptions of homogeneity of 2-dimensional space (Xie and Yan 2008; Okabe et al. 2009). NetKDE  
85 has the advantage over planar KDE that distances are not measured in 2-dimensional Euclidean space, but rather in  
86 network distance. We performed these analyses using QGIS version 2.18.13 (Quantum GIS Development Team  
87 2017) and SANET version 4.1 Standalone (Okabe et al. 2006).

88 Cheetah carcasses were generally not located directly on road surfaces, so the closest point on the road network  
89 incorporated into the analyses. Most cheetah mortalities were located close to paved roads, but two were recorded  
90 near to unpaved roads, in which case the unpaved roads in close proximity to the data points were digitised using  
91 satellite imagery from Google Earth, and added to the road network. We performed the NetKDE analyses using the  
92 kernel type equal split at discontinuous nodes in SANET. Different bandwidths were tested and visually inspected  
93 (500 m, 750 m, 850 m, 1,000 m, 1,500 m, 2,000 m). We selected the 1,500 m bandwidth as the most suitable for our  
94 dataset, given the low sample size and large network area.

95

#### 96 **Results**

97 A total of 16 Asiatic cheetah roadkills were recorded between 2004 and 2016 in Iran (Fig. 1). Nine collisions with  
98 cheetahs occurred inside protected areas and 7 occurred on roads bordering protected areas. Most Asiatic cheetah  
99 road mortalities occurred in Yazd Province (9 roadkills), followed by Semnan Province (6 roadkills), and Kerman  
100 Province (1 roadkill; Table 1). The loss of females is particularly problematic, as this will exacerbate the population  
101 decline by reducing recruitment rates (Marker et al. 2003). A total of six road fragments were identified as hotspots  
102 for Asiatic cheetah road mortality. One road fragment hotspot contained six roadkills, another hotspot contained  
103 three roadkills, and four hotspots contained only one roadkill. Three cheetah road mortalities fell into areas that  
104 were not identified as roadkill hotspots. The road fragment made up of six cheetah collisions was the only hotspot  
105 located in Semnan Province. Five hotspots were located in Yazd Province, while no hotspots were located in  
106 Kerman Province (Fig. 2). The length of the road fragments identified as hotspots varied between 8 m and 3,863 m.  
107 The total length of the road networks that were identified as hotspots was 7.9 km, which represents 0.009% of the  
108 total road network analysed.

109 All fatalities occurred at night and mostly along two major highways that run through or between protected areas:  
110 the Shahroud-Sabzevar Highway in Semnan Province, which passes between the Touran Biosphere Reserve and the  
111 Khosh Yeilagh and Miandasht Wildlife Refuges, and the Mehriz-Anar Expressway, which passes through the  
112 Kalmand Protected Area in Yazd Province (Fig. 1).

113 Of the 16 collisions three involved juveniles and the rest involved adult animals (six adult females, three adult  
114 males, and four adults of unidentified sex). There was no seasonal pattern, with collisions occurring in all seasons  
115 and most months of the year, and there were also no clear longitudinal trends in the number of collisions recorded as  
116 the study progressed (Table 1).

117

## 118 **Discussion**

119 Hotspots for Asiatic cheetah mortalities due to wildlife-vehicle collisions tended to be located in close proximity to  
120 protected areas in which the species occurs. Most cheetah roadkill events were recorded on two major highways (the  
121 Shahroud-Sabzevar Highway and the Mehriz-Anar Expressway), possibly because these two roads have a high  
122 volume of traffic and were upgraded to dual carriageways approximately 20 years ago. Population growth and

123 urbanization increase the need for the road network expansion, and road construction in ecologically sensitive  
124 habitats such as protected areas and national parks has been increasing in Iran during the past decades (Monavari  
125 and Mirsaeed 2008; Makki et al. 2013; Mohammadi and Kaboli 2016). Similar trends have also been observed  
126 following the upgrade of Cradle Mountain Road in Tasmania, Australia, which led to the local extinction of eastern  
127 quolls (*Dasyurus viverrinus*) and to the severe reduction of populations of the Tasmanian devil (*Sarcophilus*  
128 *harrisii*) (Jones 2000).

129 The high level of road mortality of Asiatic cheetahs is consistent with previous research, which estimated that  
130 collisions with vehicles represented the greatest source of cheetah mortality in Iran (42% of recorded mortalities;  
131 Ahmadi et al. 2017). Road mortality appears to be much higher for Asiatic cheetahs than for many other large  
132 carnivores, and has put them at risk of extinction (Ghoddousi et al. 2017). For example collisions with vehicles were  
133 responsible for only 2% of the recorded deaths of Amur tigers (*Panthera tigris altaica*) in Primorski Krai Province,  
134 Russia; and 6-26% of leopard (*Panthera pardus*) deaths in Southern Africa (Goodrich et al. 2008; Swanepoel et al.  
135 2015).

136 Cheetahs may be more susceptible to road mortality than other large carnivores as they have very large home ranges,  
137 so they encounter roads more frequently than species with more localized home ranges (Durant et al. 2017). The  
138 high level of Asiatic cheetah mortality on Iran's roads may also be linked to road use by cheetahs. In response to  
139 threats such as persecution, poaching, habitat loss, and reduced prey availability, Asiatic cheetahs may alter their use  
140 of space by dispersing long distances from their natal ranges (Palomares and Caro 1999; Marker et al. 2008;  
141 Farhadinia et al. 2017). Thus, it is possible that cheetahs are killed in road collisions as they utilize Iran's roads as  
142 migration corridors to travel between protected areas (Kerley et al. 2002).

143 All of the road mortalities occurred at night, even though throughout most of their range cheetahs are normally most  
144 active during daylight hours (Broekhuis et al. 2014). Cheetahs may, however, be most active nocturnally in desert  
145 environments or areas in which they are persecuted, in order to avoid heat exhaustion and conflict with humans  
146 (Marnewick et al. 2006; Belbachir et al. 2015). Crossing roads at night could also be a strategy to minimize risk, as  
147 traffic volume is typically lower during the night (Clevenger et al. 2003).

148 We briefly review the options available to mitigate cheetah fatalities on Iran's roads, and provide practical  
149 recommendations on how this could be best achieved.

### 150 *1. Wildlife crossing structures*

151 Wildlife crossing structures can be very effective at reducing road mortality, especially when used in conjunction  
152 with fencing (Grilo et al. 2015). At present there are no wildlife crossing structures in Iran, but we recommend that  
153 installing wildlife crossing structures integrated with fencing should become the focus of the road fatality mitigation  
154 efforts for the Asiatic cheetah. Care should be taken to design the wildlife crossing structures to maximize their use  
155 by cheetahs (Smith et al. 2015). Larger structures, for example, tend to have higher rates of use by carnivores than  
156 smaller ones (Kusak et al. 2009). There are many different types of wildlife crossing structures, but of the designs  
157 available to them, pumas (*Puma concolor*) appeared to have a preference for open-span bridge underpasses over  
158 other types (Gloyne and Clevenger 2001). The location of wildlife crossing structures may, however, be more  
159 important than their design (Andis et al. 2017). Crossing structures should be constructed where they would have  
160 maximum impact, such as at the hotspots identified, or in areas frequently crossed by cheetahs, or along roads that  
161 bisect areas with high cheetah utilization, density or occupancy (Smith et al. 2015), following best practice  
162 guidelines (Trocmé 2015). Crossing structures are commonly used by large carnivores (Grilo et al. 2008, Andis et al.  
163 2017) so it is reasonable to expect that Asiatic cheetahs will also use them, although confirming this would require  
164 monitoring. While wildlife crossing structures are successful at reducing road mortality, they do not keep animals  
165 off the road: to achieve this fencing is also required.

### 166 *2. Fencing*

167 Fencing can be very effective at keeping animals away from roads and funnelling them towards safe areas to cross  
168 such as wildlife crossing structures, thus reducing the rate of roadkill (Seiler 2005). Fencing can also, however,  
169 fragment habitats and reduce gene flow (Riley et al. 2006). This is particularly problematic for small populations of  
170 rare species, and could result in reduced genetic diversity due to inbreeding depression. This has the potential to  
171 increase vulnerability to disease, for example, which could contribute to population declines and further increase  
172 extinction risk (Benson et al. 2016). As a result, it is imperative that fencing is used in conjunction with wildlife  
173 crossing structures in order to maintain connectivity (van der Ree et al. 2015). It is also important to incorporate

174 structures such as jump-outs into fencing designs to allow animals that breach the barrier to return to safety (Huijser  
175 et al. 2009). Iran's Ministry of Roads and Urban Development is planning on fencing 12 km of the Shahroud-  
176 Sabzevar Highway over the next two years to secure the most dangerous section of the highway (Abdollahpour  
177 2017). While we welcome this development, we recommend that fencing should be integrated with wildlife crossing  
178 structures to ensure landscape connectivity. Consideration of the optimal fencing design for the target species is also  
179 important. Fencing designs aimed at reducing roadkill rates for large felids should be used where possible, such as  
180 this design used for the Florida panther (*Felis concolor coryi*) (Foster and Humphrey 1995).

### 181 *3. Animal detection systems*

182 Animal detection systems can display a warning message to motorists when target animals are detected using  
183 electronic sensors, ensuring that warnings are very specific in time and space. Although these systems could  
184 potentially be very effective at reducing wildlife-vehicle collisions involving large animals (Huijser et al. 2015),  
185 they also have important drawbacks (Huijser et al. 2015): 1) the rate of reduction in wildlife-vehicle collisions for  
186 animal detection systems was 33-97%, compared to 80-100% for fencing integrated with wildlife crossing  
187 structures; 2) their implementation requires greater investment in the long term; 3) they are still considered  
188 experimental rather than a proven mitigation measure; and 4) they do not reduce the barrier effect of roads and  
189 traffic to wildlife. Detection systems are only able to detect larger mammals, and it seems likely that the system  
190 would be effective for cheetahs (M. Boyce, pers. comm.; M. Huijser, pers. comm.). Therefore this could be a  
191 measure worth considering for the Asiatic cheetah in the future, but it requires further investigation.

### 192 *4. Improving lighting*

193 Enhancing road lighting has sometimes been employed to reduce wildlife road fatalities, as better visibility could  
194 enhance the ability of drivers to avoid collisions with wildlife. The effectiveness of this, however, has not yet been  
195 clearly proven (Mastro et al. 2008). Furthermore, road lights have significant negative effects on the environment  
196 (Blackwell et al. 2015) and do not keep animals off roads, so we would recommend them only if fencing with  
197 wildlife crossing structures cannot be installed.

### 198 *5. Enhance warning signage*



199 To date the main approach taken to reduce road mortality for the Asiatic cheetah has been centred on the use of  
200 standard and enhanced wildlife warning signs. The authorities installed 16 warning signs on the Shahroud-Sabzevar  
201 Highway in Iran in 2013. Such signs are one of the most frequently used measures to mitigate wildlife road fatalities  
202 due to their low cost (Huijser et al. 2015). There is little evidence, however, that they are effective at reducing  
203 roadkill (Bullock et al. 2011), and it appears that the cheetah warning signs installed in Iran did little to reduce the  
204 rate at which cheetahs are killed on the roads. Wildlife warning signs that are spatially- and temporally-specific are  
205 more likely to be effective at reducing roadkills (Huijser et al. 2015). Iran's Ministry of Roads and Urban  
206 Development will install 25 wildlife warning signs with flashing lights before and after the 12 km fences on the  
207 Shahroud-Sabzevar Highway to reduce road mortalities involving cheetahs (Abdollahpour 2017). Flashing lights,  
208 however, cannot be considered an effective measure unless very low vehicle speeds (i.e. less than 50-60 km/h at  
209 night) can be achieved (M. Huijser, pers. comm.). We therefore do not recommend installing wildlife warning signs  
210 with flashing lights since they are highly ineffective at reducing wildlife-vehicle collisions involving cheetahs. We  
211 only recommend road signs that are specific in time and space (M. Huijser, pers. comm.) if fencing with wildlife  
212 crossing structures cannot be installed.

### 213 *6. Reducing driver speed*

214 High vehicle speed is an important factor contributing to road mortality (Ramp et al. 2006). The average speed of  
215 vehicles passing through Shahroud-Sabzevar Highway and Mehriz-Anar Expressway exceeds 120 km/h at night and  
216 is 110 km/h during the day. Reducing vehicle speed, however, is impractical on large, high-speed roads (Smith et al.  
217 2015), such as those on which we have identified roadkill hotspots. Although reducing driver speed at hotspots  
218 could help to reduce cheetah mortality rates, introducing lower speed limits and implementing traffic calming  
219 measures such as speed bumps are unlikely to be acceptable solutions (M. Huijser, pers. comm.). Iran's Ministry of  
220 Roads and Urban Development is planning on implementing traffic calming measures before and after the 12 km  
221 fences on the Shahroud-Sabzevar Highway to reduce road fatalities involving cheetahs (Abdollahpour 2017).  
222 However, we do not recommend this measure since it could be largely ineffective.

223

224 Based on this brief review of potential mitigation strategies we recommend a strategic shift in efforts to reduce road  
225 mortality of the Asiatic cheetah. The focus of mitigation should move away from wildlife warning signs, and centre  
226 on constructing wildlife crossing structures in conjunction with fencing, as these are likely to be much more  
227 effective (Andis et al. 2017). It is important to evaluate and monitor the effectiveness of mitigation strategies (Smith  
228 and van der Ree 2015). Although there are no studies available on the use of wildlife crossing structures by  
229 cheetahs, it is likely that they would use them if available, as has been observed in other large carnivores such as  
230 pumas, black bears (*Ursus americanus*), grizzly bears (*U. arctos*), and wolves (*Canis lupus*) (Gloyne and Clevenger  
231 2001; Ford et al. 2009; Benson et al. 2016). If monitoring demonstrated that the initial wildlife crossing structures  
232 and fencing were used as anticipated by cheetahs, this scheme could be expanded to a broader scale. Tools such as  
233 camera traps or microchip readers could be used to demonstrate their use by multiple individuals, a crucial step in  
234 demonstrating their use at a population level (Andis et al. 2017; Marnewick et al. 2008). Camouflaging and securing  
235 camera traps to fixed objects may help to reduce theft, which can be common as poor availability in Iran makes  
236 them a target for theft (Parchizadeh 2017a, b).

237 Installing wildlife crossing structures and fencing, and monitoring their effectiveness, will require a much greater  
238 level of investment than has previously been available to install warning signs. Building wildlife crossing structures  
239 is extremely costly (Popescu 2017), although modifying existing infrastructure can be both successful and cost-  
240 effective (Mata et al. 2008). Plans must also be made for maintenance of any infrastructure if it is to be an effective  
241 solution in the long-term (van der Ree et al. 2015). One source of funding could be insurance schemes, such as that  
242 provided by Dana Insurance Company, which contributes up to USD 14,000 per cheetah mortality caused by road  
243 collisions or herder dogs (Mehr News Agency 2016). Additional contributions from the Iran's Ministry of Roads and  
244 Urban Development would facilitate the implementation of these measures, and funding of mitigation measures  
245 should become a standard component in road development budgets (Collinson 2013).

246 Environmental issues such as strategies to reduce wildlife mortality should be considered during pre-construction  
247 planning of a road project, and should be implemented during the early construction phase by installing permanent  
248 wildlife crossing structures and fencing (Weller 2015). However, these stages are generally overlooked in Iran, and  
249 as a result the Iran's Ministry of Roads and Urban Development will spend about USD 530,000 to retrofit fences, 25  
250 wildlife warning signs with flashing lights, and traffic calming measures on approximately 14 to 15 km of the

251 Shahroud-Sabzevar Highway over the next two years, which may not be effective at reducing cheetah road fatalities.  
252 Additional support from non-profit organizations, or from private organizations operating road concessions could  
253 also prove useful, as has been the case in South Africa (Williams et al. unpublished data). Public-private  
254 partnerships can also be a key to supporting such projects, such as the current campaign to construct a wildlife  
255 crossing to protect cougars in the Santa Monica mountains in Los Angeles, USA (Popescu 2017). Such schemes in  
256 Iran could also potentially benefit from innovative funding models that have recently been gaining interest, such as  
257 the species royalty system or World Heritage Species concept (Wrangham et al. 2008; Good et al. 2017).

258 In addition to funding, institutional support is another important component necessary for effective of carnivore  
259 conservation (Treves et al. 2017). Worryingly, Iran's Department of the Environment recently declared that cheetah  
260 conservation was no longer their priority, and the United Nations Development Program announced that it is  
261 withdrawing from the crucial Conservation of the Asiatic Cheetah Project (Parchizadeh and Williams 2017). This  
262 could signal lack of political will and a fall in both domestic and international support for Asiatic cheetah  
263 conservation, which could have disastrous consequences for the species. It is important that the Department of the  
264 Environment and the international community reaffirm their commitments to Asiatic cheetah conservation if their  
265 extinction is to be avoided.

266 In conclusion, the roads of Iran pose the most serious threat to the Asiatic cheetah. A total of 16 cheetah mortalities  
267 were recorded between 2004 and 2016, which were concentrated on the Shahroud-Sabzevar Highway and the  
268 Mehriz-Anar Expressway. The loss of a single Asiatic cheetah from a remaining population of only 43 individuals  
269 on Iran's roads can have huge impacts on this critically endangered sub-species, so mitigation efforts are critical. We  
270 therefore recommend targeting roadkill mitigation measures at the hotspots identified, and we advocate a shift in  
271 strategy away from using warning signage and towards installing wildlife crossing structures in conjunction with  
272 fencing. We hope that taking an evidence-based approach and adopting these measures will go a long way towards  
273 reducing the threats posed by roads to the Asiatic cheetah.

274

275 **References**

- 276 Abdollahpour K (2017) The start of installing fences in Abbas Abad axis. <http://www.irna.ir/fa/News/82566606/> (In  
277 Farsi). Accessed 25 June 2017
- 278 Ahmadi M, Balouchi BN, Jowkar H, Hemami MR, Fadakar D, Malakouti-Khah S, Ostrowski S (2017) Combining  
279 landscape suitability and habitat connectivity to conserve the last surviving population of cheetah in Asia. *Diversity*  
280 and *Distributions* 23:592-603
- 281 Andis AZ, Huijser MP, Broberg L (2017) Performance of arch-style road crossing structures from relative  
282 movement rates of large mammals. *Frontiers in Ecology and Evolution*. <https://doi.org/10.3389/fevo.2017.00122>
- 283 Belbachir F, Pettorelli N, Wachter T, Belbachir-Bazi A, Durant SM (2015) Monitoring rarity: The critically  
284 endangered Saharan cheetah as a flagship species for a threatened ecosystem. *PLoS ONE*, 10: e0115136.  
285 doi:10.1371/journal.pone.0115136
- 286 Benson JF, Mahoney PJ, Sikich JA, Serieys LEK, Pollinger JP, Ernest HB, Riley SPD (2016) Interactions between  
287 demography, genetics, and landscape connectivity increase extinction probability for a small population of large  
288 carnivores in a major metropolitan area. *Proceedings of the Royal Society B* 283:20160957
- 289 Blackwell BF, DeVault TL, Seamans TW (2015) Understanding and mitigating the negative effects of road lighting  
290 on ecosystems. In: van der Ree R, Smith DJ, Grilo C (eds) *Handbook of Road Ecology*. John Wiley & Sons, Oxford,  
291 pp 143-150
- 292 Broekhuis F, Grunewalder S, McNutt JW, Macdonald DW (2014) Optimal hunting conditions drive circalunar  
293 behavior of a diurnal carnivore. *Behavioral Ecology* 25:1268-1275
- 294 Bullock KL, Malan G, Pretorius MD (2011) Mammal and bird road mortalities on the Upington to Twee Rivieren  
295 main road in the southern Kalahari, South Africa. *African Zoology* 46:60-71
- 296 Ceia-Hasse A, Borda-de-Água L, Grilo C, Pereira HM (2017) Global exposure of carnivores to roads. *Global*  
297 *Ecology and Biogeography* 26:592-600
- 298 Cleverger AP, Chruszcz B, Gunson KE (2003) Spatial patterns and factors influencing small vertebrate fauna  
299 roadkill aggregations. *Biological Conservation* 109:15-26

- 300 Collinson WJ (2013) A standardised protocol for roadkill detection and the determinants of roadkill in the Greater  
301 Mapungubwe Transfrontier Conservation Area, Limpopo Province, South Africa. Dissertation, Rhodes University
- 302 Collinson W, Parker D, Patterson-Abrolat C, Alexander G, Davies-Mostert H (2015) Setjhaba SA, South Afrika: a  
303 South African perspective of an emerging transport infrastructure. In: van der Ree R, Smith DJ, Grilo C (eds)  
304 Handbook of Road Ecology. John Wiley & Sons, Oxford, pp 439-447
- 305 Conservation of Asiatic Cheetah Project (2001) <http://www.cacp.ir/en/home>. Accessed 5 July 2017
- 306 Danks ZD, Porter WF (2010) Temporal, spatial, and landscape habitat characteristics of moose-vehicle collisions in  
307 western Maine. *Journal of Wildlife Management* 74:1229-1241
- 308 Durant SM, Mitchell N, Groom R, Pettoirelli N, Ipavec A, Jacobson AP, *et al* (2017) The global decline of cheetah  
309 *Acinonyx jubatus* and what it means for conservation. *Proceedings of the National Academy of Sciences* 114:528-  
310 533
- 311 Farhadinia MS, Hunter LTB, Jourabchian A, Hosseini-Zavarei F, Akbari H, Ziaie H, Schaller GB, Jowkar H (2017)  
312 The critically endangered Asiatic cheetah *Acinonyx jubatus venaticus* in Iran: a review of recent distribution, and  
313 conservation status. *Biodiversity and Conservation*. doi:10.1007/s10531-017-1298-8
- 314 Ford AT, Clevenger AP, Bennett A (2009) Comparison of methods of monitoring wildlife crossing-structures on  
315 highways. *Journal of Wildlife Management* 73:1213-1222
- 316 Foster ML, Humphrey SR (1995) Use of highway underpasses by Florida panthers and other wildlife. *Wildlife*  
317 *Society Bulletin* 23:95-100
- 318 Gadd ME (2015) Expected effects of a road across the Seerengeti. In: van der Ree R, Smith DJ, Grilo C (eds)  
319 Handbook of Road Ecology. John Wiley & Sons, Oxford, pp 455-464
- 320 Ghoddousi A, Egli L, Soofi M, Khorozyan I, Waltert M (2017) After sanctions: the urge to upgrade and integrate  
321 conservation in Iran. *Frontiers in Ecology and the Environment* 15:9-10
- 322 Gloyne CC, Clevenger AP (2001) Cougar *Puma concolor* use of wildlife crossing structures on the Trans-Canada  
323 highway in Banff National Park, Alberta. *Wildlife Biology* 7:117-124

- 324 Good C, Burnham D, Macdonald D (2017) A cultural conscience for conservation. *Animals* 7:1-7
- 325 Goodrich JM, Kerley LL, Smirnov EN, Miquelle DG, McDonald L, Quigley HB, Hornocker MG, McDonald T  
326 (2008) Survival rates and causes of mortality of Amur tigers on and near the Sikhote-Alin Biosphere Zapovednik.  
327 *Journal of Zoology* 276:323-329
- 328 Grilo C, Bissonette JA, Santos-Reis M (2008) Response of carnivores to existing highway culverts and underpasses:  
329 implications for road planning and mitigation. *Biodiversity and Conservation* 17:1685-1699
- 330 Grilo C, Smith DJ, Klar N (2015) Carnivores: struggling for survival in roaded landscapes. In: van der Ree R, Smith  
331 DJ, Grilo C (eds) *Handbook of Road Ecology*. Wiley-Blackwell, Chichester, pp 300-312
- 332 Heshmati GA (2007) Vegetation Characteristics of four ecological zones of Iran. *International Journal of Plant*  
333 *Production* 1:215-224
- 334 Huijser MP, Duffield J, Clevenger A, Ament R, McGowen P (2009) Cost-benefit analyses of mitigation measures  
335 aimed at reducing collisions with large ungulates in the United States and Canada: a decision support tool. *Ecology*  
336 *and Society* 14
- 337 Huijser MP, Mosler-Berger C, Olsson M, Strein M (2015) Wildlife warning signs and animal detection systems  
338 aimed at reducing wildlife-vehicle collisions. In: van der Ree R, Smith DJ, Grilo C (eds) *Handbook of Road*  
339 *Ecology*. Wiley-Blackwell, Chichester, pp 198-212
- 340 Hunter L, Jowkar H, Ziaie H, Schaller GB, Balme G, Walzer C, Ostrowski S, Zahler P, Robert- Charrue N, Kashiri  
341 K, Christie S (2007) Conserving the Asiatic cheetah in Iran: Launching the first radio telemetry study. *Cat News*  
342 46:8-11
- 343 Jones ME (2000) Road upgrade, road mortality and remedial measures: impacts on a population of eastern quolls  
344 and Tasmanian devils. *Wildlife Research* 27:289-296
- 345 Jowkar H, Hunter L, Ziaie H, Marker L, Breitenmoser-Wursten C, Durant S (2008) *Acinonyx jubatus ssp. venaticus*.  
346 The IUCN Red List of Threatened Species 2008: e.T220A13035342. 2008.  
347 <http://dx.doi.org/10.2305/IUCN.UK.2008.RLTS.T220A13035342.en>. Accessed 5 July 2017

- 348 Kerley LL, Goodrich JM, Miquelle DG, Smirnov EN, Quigley HB, Hornocker MG (2002) Effects of roads and  
349 human disturbance on Amur tigers. *Conservation Biology* 16:97-108
- 350 Khaleghparast A (2015). Road-kills of the Asiatic cheetah in Iran. *Tarabaran* 135:94-99 (In Farsi)
- 351 Kusak J, Huber D, Gomerčić T, Schwaderer G, Gužvica G (2009) The permeability of highway in Gorski kotar  
352 (Croatia) for large mammals. *European Journal of Wildlife Research* 55:7-21
- 353 Laurance WF, Goosem M, Laurance SG (2009) Impacts of roads and linear clearings on tropical forests. *Trends in*  
354 *Ecology & Evolution* 24:659-669
- 355 Makki T, Fakheran S, Moradi H, Iravani M, Senn J (2013) Landscape-scale impacts of transportation infrastructure  
356 on spatial dynamics of two vulnerable ungulate species in Ghamishloo Wildlife Refuge, Iran. *Ecological Indicators*  
357 31:6-14
- 358 Mansouri H (2004) Islamic Republic Of Iran. In: Sustainable dairy-sector development for poverty reduction  
359 conference. University of Agriculture Faisalabad, Faisalabad, Punjab, Pakistan, pp 78-82
- 360 Marker LL, Dickman AJ, Jeo RM, Mills MGL, Macdonald DW (2003) Demography of the Namibian cheetah,  
361 *Acinonyx jubatus jubatus*. *Biological Conservation* 114:413-425
- 362 Marker LL, Wilkerson AJP, Sarno RJ, Martenson J, Breitenmoser-Wursten C, O'Brien SJ, Johnson WE (2008)  
363 Molecular genetic insights on cheetah (*Acinonyx jubatus*) ecology and conservation in Namibia. *Journal of Heredity*  
364 99:2-13
- 365 Marnewick KA, Bothma JD, Verdoorn GH (2006) Using camera-trapping to investigate the use of a tree as a scent-  
366 marking post by cheetahs in the Thabazimbi district. *South African Journal of Wildlife Research* 36:139-145
- 367 Marnewick KA, Funston PJ, Karanth KU (2008) Evaluating camera trapping as a method for estimating cheetah  
368 abundance in ranching areas. *South African Journal of Wildlife Research* 38:59-65
- 369 Mastro LL, Conover MR, Frey SN (2008) Deer-vehicle collision prevention techniques. *Human-Wildlife Conflicts*  
370 2:80-92

- 371 Mata C, Hervás I, Herranz J, Suárez F, Malo J (2008) Are motorway wildlife passages worth building? Vertebrate  
372 use of road-crossing structures on a Spanish motorway. *Journal of Environmental Management* 88:407-415
- 373 Mehr News Agency (2016) Dana Insurance works with UNDP in Asiatic Cheetah Project.  
374 <http://en.mehrnews.com/news/120320/>. Accessed 15 May 2017
- 375 Mohammadi A, Kaboli M (2016) Evaluating wildlife-vehicle collision hotspots using kernel-based estimation: a  
376 focus on the endangered Asiatic cheetah in central Iran. *Human-Wildlife Interactions* 10:103-109
- 377 Monavari M, Mirsaeed SG (2008) Ecological impact assessment of highways on national parks: Tehran -Pardis  
378 Highway (Iran). *International Journal of Environmental Research* 2:133-138
- 379 Morelle K, Lehaire F, Lejeune P (2013) Spatio-temporal patterns of wildlife-vehicle collisions in a region with a  
380 high-density road network. *Nature Conservation* 5:53
- 381 Okabe A, Okunuki KI, Shiode S (2006) SANET: a toolbox for spatial analysis on a network. *Geographical Analysis*  
382 38:57-66
- 383 Okabe A, Satoh T, Sugihara K (2009) A kernel density estimation method for networks, its computational method  
384 and a GIS-based tool. *International Journal of Geographical Information Science* 23:7-32
- 385 Özcan AU, Özkazanç NK (2017) Identifying the hotspots of wildlife-vehicle collision on the Çankırı-Kırıkkale  
386 highway during summer. *Turkish Journal of Zoology* 41:722-730
- 387 Palomares F, Caro TM (1999) Interspecific killing among mammalian carnivores. *The American Naturalist*  
388 153:492-508
- 389 Parchizadeh J (2017a) Spatiotemporal distribution of large- and medium-sized mammals and humans in the Lar  
390 Protected Area, Iran. *Wildlife Research* 44:400-406
- 391 Parchizadeh J (2017b) The Neglected Brown Bears of Iran. *International Bear News* 26:9
- 392 Parchizadeh J, Williams ST (2017) Save Iran's cheetah from extinction. *Nature* 552 (7683):31



- 393 Popescu A (2017) LA's endangered pumas to be saved by a \$60m bridge over highway.  
394 <https://www.newscientist.com/article/2138268-las-endangered-pumas-to-be-saved-by-a-60m-bridge-over-highway>.  
395 Accessed 3 July 2017
- 396 Quantum GIS Development Team (2017) QGIS Geographic Information System. Open Source Geospatial  
397 Foundation Project. <http://qgis.osgeo.org>. Accessed 14 November 2017
- 398 Ramp D, Wilson VK, Croft DB (2006) Assessing the impacts of roads in peri-urban reserves: road-based fatalities  
399 and road usage by wildlife in the Royal National Park, New South Wales, Australia. *Biological Conservation*  
400 129:348-359
- 401 Riley SPD, Pollinger JP, Sauvajot RM, York EC, Bromley C, Fuller TK, Wayne RK (2006) FAST-TRACK: A  
402 southern California freeway is a physical and social barrier to gene flow in carnivores. *Molecular Ecology* 15:1733-  
403 1741
- 404 Sabziparvar AA (2008) A simple formula for estimating global solar radiation in central arid deserts of Iran.  
405 *Renewable Energy* 33:1002-1010
- 406 Seiler A (2005) Predicting locations of moose-vehicle collisions in Sweden. *Journal of Applied Ecology* 42:371-382
- 407 Smith DJ, van der Ree R (2015) Field methods to evaluate the impacts of roads on wildlife. In: van der Ree R, Smith  
408 DJ, Grilo C (eds) *Handbook of Road Ecology*. Wiley-Blackwell, Chichester, pp 82-95
- 409 Smith DJ, van der Ree R, Rosell C (2015) Wildlife crossing structures: an effective strategy to restore or maintain  
410 wildlife connectivity across roads. In: van der Ree R, Smith DJ, Grilo C (eds) *Handbook of Road Ecology*. Wiley-  
411 Blackwell, Chichester, pp 172-183
- 412 Snow NP, Williams DM, Porter WF (2014) A landscape-based approach for delineating hotspots of wildlife-vehicle  
413 collisions. *Landscape ecology* 29:817-829
- 414 Swanepoel LH, Somers MJ, Van Hoven W, Schiess-Meier M, Owen C, Snyman A, Martins Q, Senekal C, Camacho  
415 G, Boshoff W, Dalerum F (2015) Survival rates and causes of mortality of leopards *Panthera pardus* in southern  
416 Africa. *Oryx* 49:595-603

- 417 Tawiri (2005) Proceedings of the first Tanzania Cheetah Conservation Action Plan Workshop. Arusha.
- 418 Treves A, Chapron G, López-Bao JV, Shoemaker C, Goeckner AR, Bruskotter JT (2017) Predators and the public  
419 trust. *Biological Reviews* 92:248-270
- 420 Trocmé M (2015) Best-practice guidelines and manuals. In: van der Ree R, Smith DJ, Grilo C (eds) *Handbook of*  
421 *Road Ecology*. Wiley-Blackwell, Chichester, pp 479-484
- 422 van der Ree R, Gagnon JW, Smith DJ (2015) Fencing: A valuable tool for reducing wildlife-vehicle collisions and  
423 funnelling fauna to crossing structures. In: van der Ree R, Smith DJ, Grilo C (eds) *Handbook of Road Ecology*.  
424 Wiley-Blackwell, Chichester, pp 159-171
- 425 Weller C (2015) Construction of roads and wildlife mitigation measures: pitfalls and opportunities. In: van der Ree  
426 R, Smith DJ, Grilo C (eds) *Handbook of Road Ecology*. John Wiley & Sons, Oxford, pp 60-64
- 427 Wrangham RW, Hagen G, Leighton M, Marshall AJ, Waldau P, Nishida T (2008) The great ape world heritage  
428 species project. In: Stoinski TS, Steklis HD, Mehlman PT) *Conservation in the 21st century: Gorillas as a case*  
429 *study*. Springer, New York, pp 282-295
- 430 Xie Z, Yan J (2008). Kernel density estimation of traffic accidents in a network space. *Computers, Environment and*  
431 *Urban Systems* 32:396-406
- 432
- 433
- 434
- 435
- 436
- 437
- 438

439 **Figures**

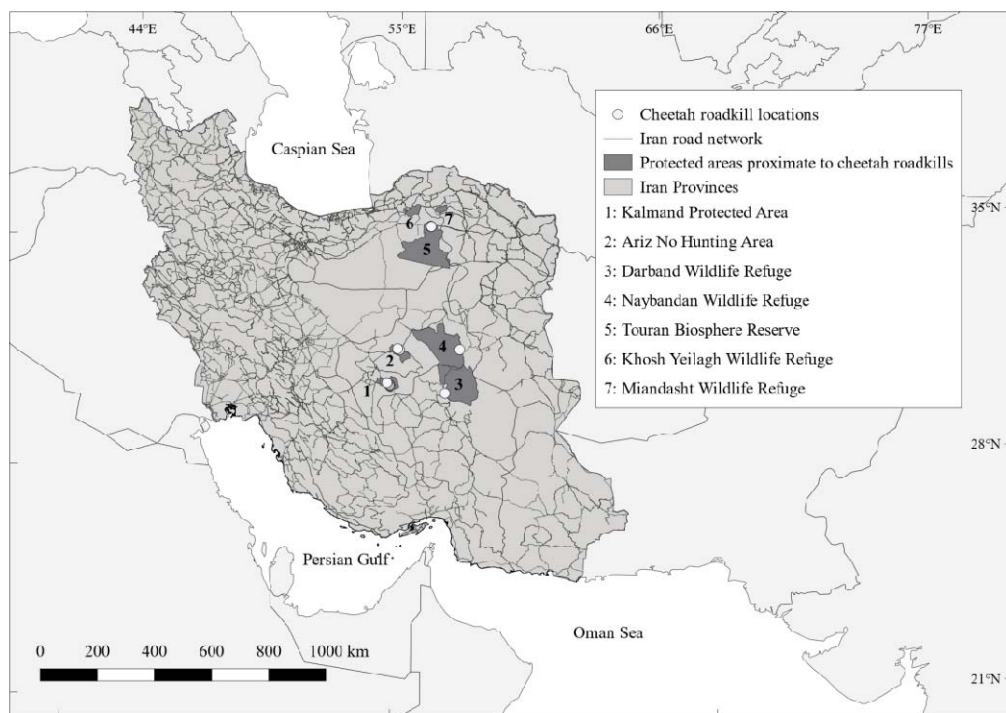

440

441 **Fig. 1a**

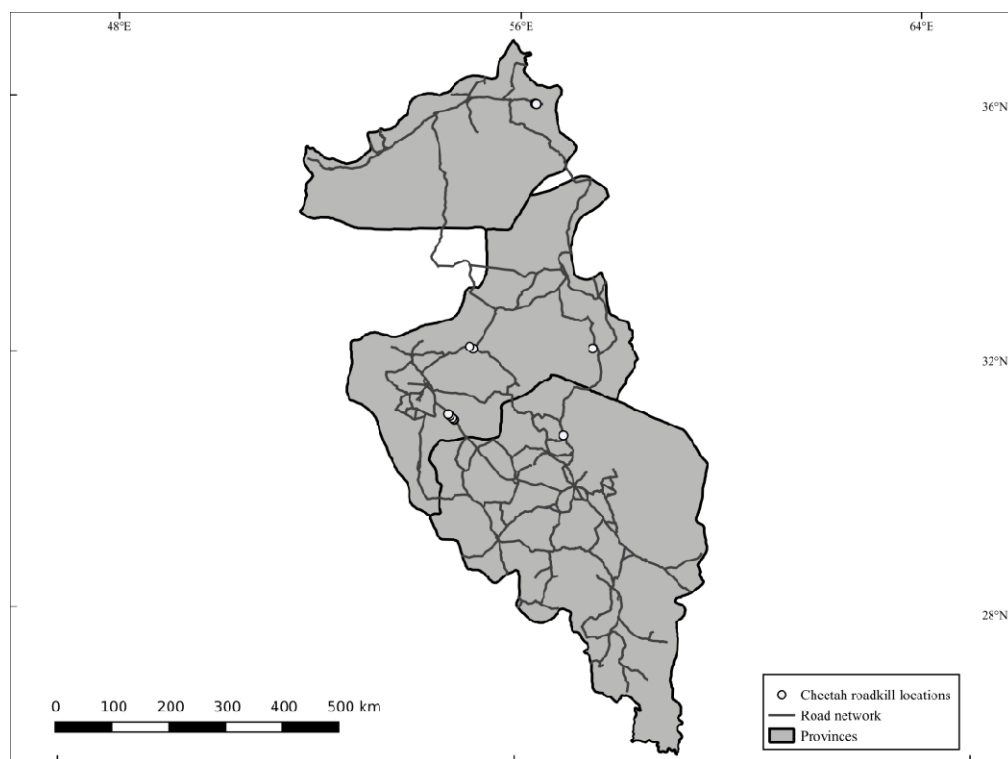

442

443 **Fig. 1b**

444 **Fig. 1** Map showing the locations of cheetah roadkill across a) Iran, and b) the three provinces in which the  
445 mortalities were recorded (the name of the provinces downward are; Semnan, Yazd, and Kerman) (some circles  
446 represent multiple cheetah roadkill locations)

447

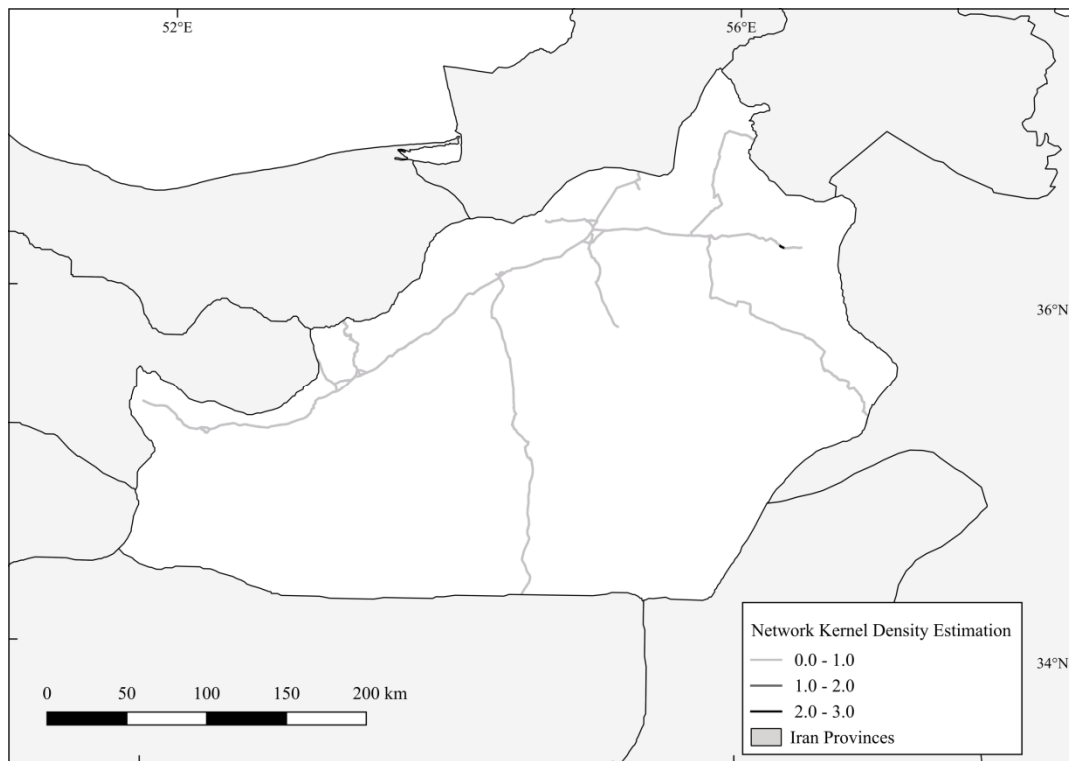

448

449 **Fig. 2a**

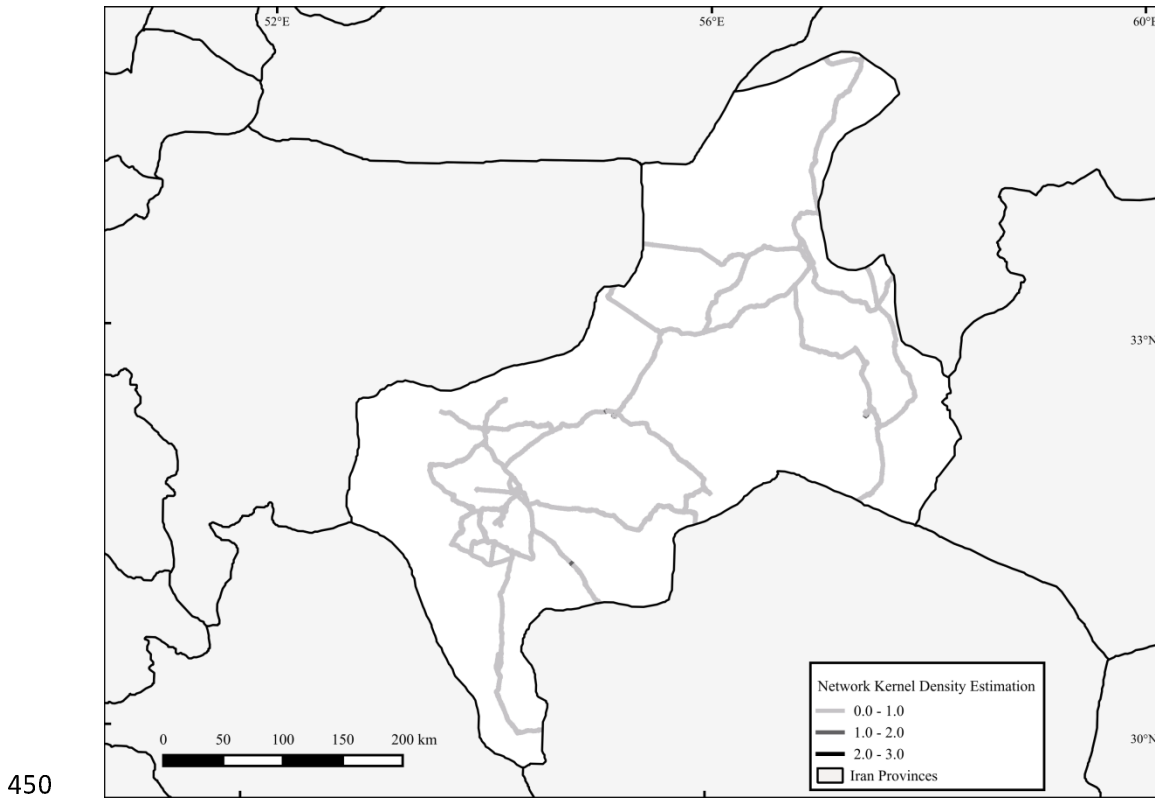

451 **Fig. 2b**

452 **Fig. 2** Map showing the locations of the cheetah roadkill hotspots identified using network kernel density estimation  
 453 in a) Semnan Province, and b) Yazd Province

454

455 **Table 1** Details of Asiatic cheetah road fatalities recorded in Iran between 2004 and 2016

| Age   | Sex     | Province | Location                    | Highway     | Month    | Year | Season | Time  |
|-------|---------|----------|-----------------------------|-------------|----------|------|--------|-------|
| Adult | Unknown | Yazd     | Dareh Anjir Wildlife Refuge | -           | -        | 2004 | Summer | Night |
| Adult | Female  | Yazd     | Kalmand Protected Area      | Mehriz-Anar | January  | 2005 | Winter | Night |
| Adult | Male    | Yazd     | Kalmand Protected Area      | Mehriz-Anar | February | 2006 | Winter | Night |
| Adult | Unknown | Yazd     | Kalmand Protected Area      | Mehriz-Anar | April    | 2006 | Spring | Night |
| Adult | Male    | Yazd     | Kalmand Protected Area      | Mehriz-Anar | -        | 2008 | Winter | Night |
| Adult | Male    | Yazd     | Kalmand Protected Area      | Mehriz-Anar | April    | 2008 | Spring | Night |

|          |         |        |                                                                                                    |                  |          |      |        |       |
|----------|---------|--------|----------------------------------------------------------------------------------------------------|------------------|----------|------|--------|-------|
| Adult    | Female  | Yazd   | Kalmand Protected Area                                                                             | Mehriz-Anar      | November | 2008 | Autumn | Night |
| Adult    | Unknown | Kerman | Darband Wildlife Refuge<br>Between the Touran                                                      | -                | November | 2008 | Autumn | Night |
| Juvenile | Female  | Semnan | Biosphere Reserve and the<br>Khosh Yeilagh and<br>Miandasht Wildlife Refuges<br>Between the Touran | Shahrud-Sabzevar | July     | 2010 | Summer | Night |
| Juvenile | Male    | Semnan | Biosphere Reserve and the<br>Khosh Yeilagh and<br>Miandasht Wildlife Refuges<br>Between the Touran | Shahrud-Sabzevar | July     | 2010 | Summer | Night |
| Adult    | Female  | Semnan | Biosphere Reserve and the<br>Khosh Yeilagh and<br>Miandasht Wildlife Refuges                       | Shahrud-Sabzevar | July     | 2010 | Summer | Night |
| Adult    | Unknown | Yazd   | Naybandan Wildlife Refuge                                                                          | -                | March    | 2011 | Winter | Night |
| Adult    | Female  | Yazd   | Dareh Anjir Wildlife Refuge<br>Between the Touran                                                  | -                | May      | 2011 | Spring | Night |
| Adult    | Female  | Semnan | Biosphere Reserve and the<br>Khosh Yeilagh and<br>Miandasht Wildlife Refuges<br>Between the Touran | Shahrud-Sabzevar | December | 2014 | Autumn | Night |
| Juvenile | Female  | Semnan | Biosphere Reserve and the<br>Khosh Yeilagh and<br>Miandasht Wildlife Refuges<br>Between the Touran | Shahrud-Sabzevar | December | 2014 | Autumn | Night |
| Adult    | Female  | Semnan | Biosphere Reserve and the<br>Khosh Yeilagh and<br>Miandasht Wildlife Refuges                       | Shahrud-Sabzevar | May      | 2016 | Spring | Night |

456

457
